# Supplementary material for: Multiple Long-Read Sequencing Survey of Herpes Simplex Virus Dynamic Transcriptome
Source: Front Genet. 2019 Sep 24;10:834. doi: 10.3389/fgene.2019.00834 (PMC6769088; doi:10.3389/fgene.2019.00834)
Supplement: Supplementary Table 4 — Novel 5’-truncated transcripts with putative coding potential. This table summarizes novel and the previously published embedded mRNAs, as well as their genomic positions. Asterisks indicate transcripts that were also detected in our earlier study (Tombácz et al., 2017b). [file Table_4.xlsx]

## Sheet: Munka1
TSS	TES	Strand	Name		Coordinates
9998	10960	+	ul2.7		((9998, 10960),)
9998	11733	+	ul2.7-3		((9998, 11733),)
10186	10960	+	ul2.6		((10186, 10960),)
10186	11733	+	ul2.6-3		((10186, 11733),)
10323	10960	+	ul2.5-L	*	((10323, 10960),)
10323	11733	+	ul2.5-3-L	*	((10323, 11733),)
10336	10960	+	ul2.5	*	((10336, 10960),)
10336	11733	+	ul2.5-3	*	((10336, 11733),)
10451	11733	+	ul2.3-3-S2		((10451, 11733),)
10451	10960	+	ul2.5-S2		((10451, 10960),)
10616	10960	+	ul2.4-S		((10616, 10960),)
10616	11733	+	ul2.4-3-S		((10616, 11733),)
10736	10960	+	ul2.3		((10736, 10960),)
10736	11733	+	ul2.3-3		((10736, 11733),)
10974	11733	+	ul3.5	*	((10974, 11733),)
12155	11738	-	ul4.8-S4		((11738, 12155),)
12295	11738	-	ul4.8		((11738, 12295),)
13518	11738	-	ul5.4-4	*	((11738, 13518),)
14253	11738	-	ul5.7-4		((11738, 14253),)
14253	11738	-	ul5.7-4-sp		((11738, 13448), (13932, 14253))
16433	18060	+	ul6.5-7	*	((16433, 18060),)
17767	18060	+	ul7.5		((17767, 18060),)
18461	18192	-	ul8.3		((18192, 18461),)
18776	18192	-	ul8.5-S		((18192, 18776),)
18920	18192	-	ul8.5		((18192, 18920),)
23206	24667	+	ul10.9		((23206, 24667),)
23469	24667	+	ul10.8-S5		((23469, 24667),)
23512	24667	+	ul10.8-S7		((23512, 24667),)
23734	24667	+	ul10.7-S4		((23734, 24667),)
23984	24667	+	ul10.5-S		((23984, 24667),)
24142	24667	+	ul10.5-S5		((24142, 24667),)
24297	24667	+	ul10.3		((24297, 24667),)
25073	24784	-	ul11.5		((24784, 25073),)
26388	24784	-	ul12.7		((24784, 26388),)
26584	24784	-	ul12.9-11-S		((24784, 26584),)
27675	24784	-	ul13.5-12-11		((24784, 27675),)
29409	34840	+	ul15.9-S2	*	((29409, 30048), (33635, 34840))
30456	30147	-	ul16.1-L		((30147, 30456),)
30645	30147	-	ul16.3		((30147, 30645),)
33153	34840	+	ul15.8-S6-sp		((33153, 33485), (33635, 34840))
33153	34840	+	ul15.8-S6		((33153, 34840),)
33868	34840	+	ul15.6		((33868, 34840),)
37304	35002	-	ul19.1-18		((35002, 37304),)
42550	43708	+	ul21.5-S		((42550, 43708),)
42836	43708	+	ul21.5-S3		((42836, 43708),)
42953	43708	+	ul21.5-S5		((42953, 43708),)
43159	43708	+	ul21.5-S10		((43159, 43708),)
43237	43708	+	ul21.5-S12		((43237, 43708),)
44796	43818	-	ul22.5		((43818, 44796),)
44955	43818	-	ul22.5-L2		((43818, 44955),)
45288	43818	-	ul22.5-L6		((43818, 45288),)
47404	52783	+	ul24-25-26-26.5-L		((47404, 52783),)
47673	52783	+	ul24-25-26-26.5		((47673, 52783),)
48082	48767	+	ul24.5	*	((48082, 48767),)
48082	52783	+	ul24.5-25-26-26.5	*	((48082, 52783),)
50666	52783	+	ul26-26.5		((50666, 52783),)
50913	52783	+	ul26.5-L3		((50913, 52783),)
51232	52783	+	ul26.5-L2		((51232, 52783),)
51634	52783	+	ul26.5	*	((51634, 52783),)
51747	52783	+	uL26.4-S		((51747, 52783),)
51774	52783	+	ul26.4		((51774, 52783),)
52104	52783	+	ul26.4-S8		((52104, 52783),)
52182	52783	+	ul26.4-S10		((52182, 52783),)
52254	52783	+	ul26.4-S13		((52254, 52783),)
53187	53040	-	ul27.1-S		((53040, 53187),)
53316	52796	-	ul27.3-AT		((52796, 53316),)
53316	53040	-	ul27.3		((53040, 53316),)
53469	53040	-	ul27.4		((53040, 53469),)
53718	53040	-	ul27.8		((53040, 53718),)
53959	53040	-	ul27.9		((53040, 53959),)
54130	53040	-	ul27.11-S3		((53040, 54130),)
54232	53040	-	ul27.11		((53040, 54232),)
54277	52796	-	ul27.12-AT		((52796, 54277),)
54277	53040	-	ul27.12		((53040, 54277),)
54336	53040	-	ul27.12-L	*	((53040, 54336),)
54459	53040	-	ul27.12-L4		((53040, 54459),)
54478	52796	-	ul27.12-L4-AT		((52796, 54478),)
54478	53040	-	ul27.12-L5		((53040, 54478),)
58893	58397	-	ul29.4		((58397, 58893),)
69727	70959	+	ul34.7-35-S	*	((69727, 70959),)
70043	70959	+	ul34.5-35-S2		((70043, 70959),)
70673	70959	+	ul35.6		((70673, 70959),)
70707	70959	+	ul35.6-S		((70707, 70959),)
71219	70966	-	ul36.2-S4		((70966, 71219),)
71523	70966	-	ul36.2	*	((70966, 71523),)
72437	70966	-	ul36.2-L9		((70966, 72437),)
74803	70966	-	ul36.6	*	((70966, 74803),)
81005	80692	-	ul37.3		((80692, 81005),)
85118	86035	+	ul38.7		((85118, 86035),)
85364	86035	+	ul38.5		((85364, 86035),)
85427	86035	+	ul38.5-S		((85427, 86035),)
85569	86035	+	ul38.5-S4		((85569, 86035),)
89129	90998	+	ul39.12-40		((89129, 90998),)
89606	90998	+	ul39.5-44		((89606, 90998),)
89775	94655	+	ul40-41-42.7_c		((89775, 94655),)
90123	90998	+	ul40.3-S7		((90123, 90998),)
90206	90998	+	ul40.3-S9		((90206, 90998),)
90582	90998	+	ul40.4-S3		((90582, 90998),)
90634	90998	+	ul40.4-S4		((90634, 90998),)
90733	90998	+	ul40.4-S6		((90733, 90998),)
90733	94655	+	ul40.4-41-412_c		((90733, 94655),)
91596	91094	-	ul41.4-S2		((91094, 91596),)
91778	91094	-	ul41.4-S		((91094, 91778),)
91845	91094	-	ul41.4	*	((91094, 91845),)
91878	91094	-	ul41.4-L	*	((91094, 91878),)
92478	91094	-	ul41.8		((91094, 92478),)
93179	94655	+	ul42.9		((93179, 94655),)
93773	94655	+	ul42.7	*	((93773, 94655),)
93773	96084	+	ul42.7-43		((93773, 96084),)
94078	94655	+	ul42.6		((94078, 94655),)
94768	96084	+	ul43.9	*	((94768, 96084),)
94768	98694	+	ul43.9-44-45		((94768, 98694),)
96380	98694	+	ul44.9-45-L2		((96380, 98694),)
96380	98694	+	ul44.9-45-L2-sp		((96380, 97723), (97950, 98694))
96623	98694	+	ul44.7-45	*	((96623, 98694),)
96623	98694	+	ul44.7-45-sp	*	((96623, 97723), (97950, 98694))
96799	98694	+	ul44.6-45		((96799, 98694),)
96799	98694	+	ul44.6-45-sp		((96799, 97723), (97950, 98694))
97144	98694	+	ul44.2-45		((97144, 98694),)
97144	98694	+	ul44.2-45-sp		((97144, 97723), (97950, 98694))
98093	98694	+	ul45.7-S2		((98093, 98694),)
99095	98709	-	ul46.3		((98709, 99095),)
99148	98709	-	ul46.3-L		((98709, 99148),)
99262	98709	-	ul46.4-S		((98709, 99262),)
99288	98709	-	ul46.4		((98709, 99288),)
99571	98709	-	ul46.5		((98709, 99571),)
103714	103518	-	ul48.1		((103518, 103714),)
103857	103518	-	ul48.3-S2		((103518, 103857),)
103904	103518	-	ul48.3		((103518, 103904),)
103946	103518	-	ul48.3-L2		((103518, 103946),)
104048	103518	-	ul48.4		((103518, 104048),)
104129	103518	-	ul48.5-S		((103518, 104129),)
104228	103518	-	ul48.5-L4		((103518, 104228),)
104361	103518	-	ul48.7		((103518, 104361),)
104471	103518	-	ul48.8-S5		((103518, 104471),)
104564	103518	-	ul48.8-S3		((103518, 104564),)
104736	103518	-	ul48.8		((103518, 104736),)
104866	103518	-	ul48.9		((103518, 104866),)
104960	103518	-	ul48.11		((103518, 104960),)
105042	103518	-	ul48.11-L3		((103518, 105042),)
105776	103518	-	ul49.4-48		((103518, 105776),)
105776	105442	-	ul49.4		((105442, 105776),)
106073	103518	-	ul49.4-48-L5		((103518, 106073),)
106073	105442	-	ul49.4-L5		((105442, 106073),)
107154	108170	+	ul50.7	*	((107154, 108170),)
107367	108170	+	ul50.3	*	((107367, 108170),)
107485	108170	+	ul50.3-S4		((107485, 108170),)
108804	108259	-	ul51.8		((108259, 108804),)
108959	108259	-	ul51.9		((108259, 108959),)
112152	113459	+	ul53.9		((112152, 113459),)
112152	115299	+	ul53.9-54		((112152, 115299),)
112508	113459	+	ul53.5	*	((112508, 113459),)
112508	115299	+	ul53.5-54	*	((112508, 115299),)
112508	116117	+	ul53.5-54-55		((112508, 116117),)
114668	115299	+	ul54.5-S3		((114668, 115299),)
114668	116117	+	ul54.5-55		((114668, 116117),)
115027	115299	+	ul54.1	*	((115027, 115299),)
115027	116117	+	ul54.1-55		((115027, 116117),)
115530	116117	+	ul55.9		((115530, 116117),)
115732	116117	+	ul55.8		((115732, 116117),)
115792	116117	+	ul55.8-S		((115792, 116117),)
116811	116182	-	ul56.9		((116182, 116811),)
132665	133957	+	us1.1		((132665, 133957),)
132836	133957	+	us1.1-S3		((132836, 133957),)
133084	133957	+	us1.3		((133084, 133957),)
133260	133957	+	us1.4		((133260, 133957),)
134316	134021	-	us2.2		((134021, 134316),)
135356	137532	+	us3.9-4		((135356, 137532),)
138472	141033	+	us6.9-7		((138472, 141033),)
139907	141033	+	us7.9		((139907, 141033),)
139964	141033	+	us7.9-S2		((139964, 141033),)
140276	141033	+	us7.6		((140276, 141033),)
140276	143690	+	us7.6-8-9		((140276, 143690),)
140361	141033	+	us7.6-S3		((140361, 141033),)
141654	143690	+	us8.9-9		((141654, 143690),)
141710	143690	+	us8.8.-9		((141710, 143690),)
143381	143690	+	us9.6		((143381, 143690),)
143467	143690	+	us9.5-S		((143467, 143690),)
143503	143690	+	us9.5-S3		((143503, 143690),)
144757	144125	-	us10.5		((144125, 144757),)
